# Supplementary material for: Clinical Characteristics and Prognostic Significance of Subclinical Seizures in Focal Epilepsy: A Retrospective Study
Source: Springer Nature journal article supplement (doi:10.1007/s40120-022-00342-y), 2022-04-04
Supplement: MOESM1 [file 20281884]

## **Clinical Characteristics and Prognostic Significance of Subclinical Seizures in Focal Epilepsy: A Retrospective Study**

Chenmin He<sup>1</sup>, Cong Chen<sup>1</sup>, Yuyu Yang<sup>1</sup>, Lingli Hu<sup>1</sup>, Bo Jin<sup>2</sup>, Wenjie Ming<sup>1</sup>, Zhongjin Wang<sup>1</sup>, Yao Ding<sup>1</sup>, Meiping Ding<sup>1</sup>, Shuang Wang<sup>1\*</sup>, Shan Wang<sup>1\*</sup>

<sup>1</sup>Epilepsy Center, Department of Neurology, Second Affiliated Hospital, School of Medicine, Zhejiang University, Hangzhou, China

<sup>2</sup>Department of Neurology, Zhejiang Provincial People's Hospital, Hangzhou, China

\*Correspondence to :

Shan Wang<sup>1\*</sup>

Epilepsy Center, Department of Neurology, Second Affiliated Hospital, School of Medicine, Zhejiang University, Hangzhou 310009, China

E-mail: [ws\\_epilepsy2019@zju.edu.cn](mailto:ws_epilepsy2019@zju.edu.cn).

Shuang Wang<sup>1\*</sup>

Epilepsy Center, Department of Neurology, Second Affiliated Hospital, School of Medicine, Zhejiang University, Hangzhou 310009, China

E-mail: [wangs77@zju.edu.cn](mailto:wangs77@zju.edu.cn).

*Chenmin He and Cong Chen contributed equally*

Supplementary figure 1. The relationship between the VEEG time (A) / IEEG time (B) and the occurrence of SCSs. s-SCSs = subclinical seizures recorded by scalp VEEG; non-s-SCSs = had no subclinical seizures recorded by scalp VEEG; i-SCSs = subclinical seizures recorded by IEEG; non-i-SCSs = had no subclinical seizures recorded by IEEG.

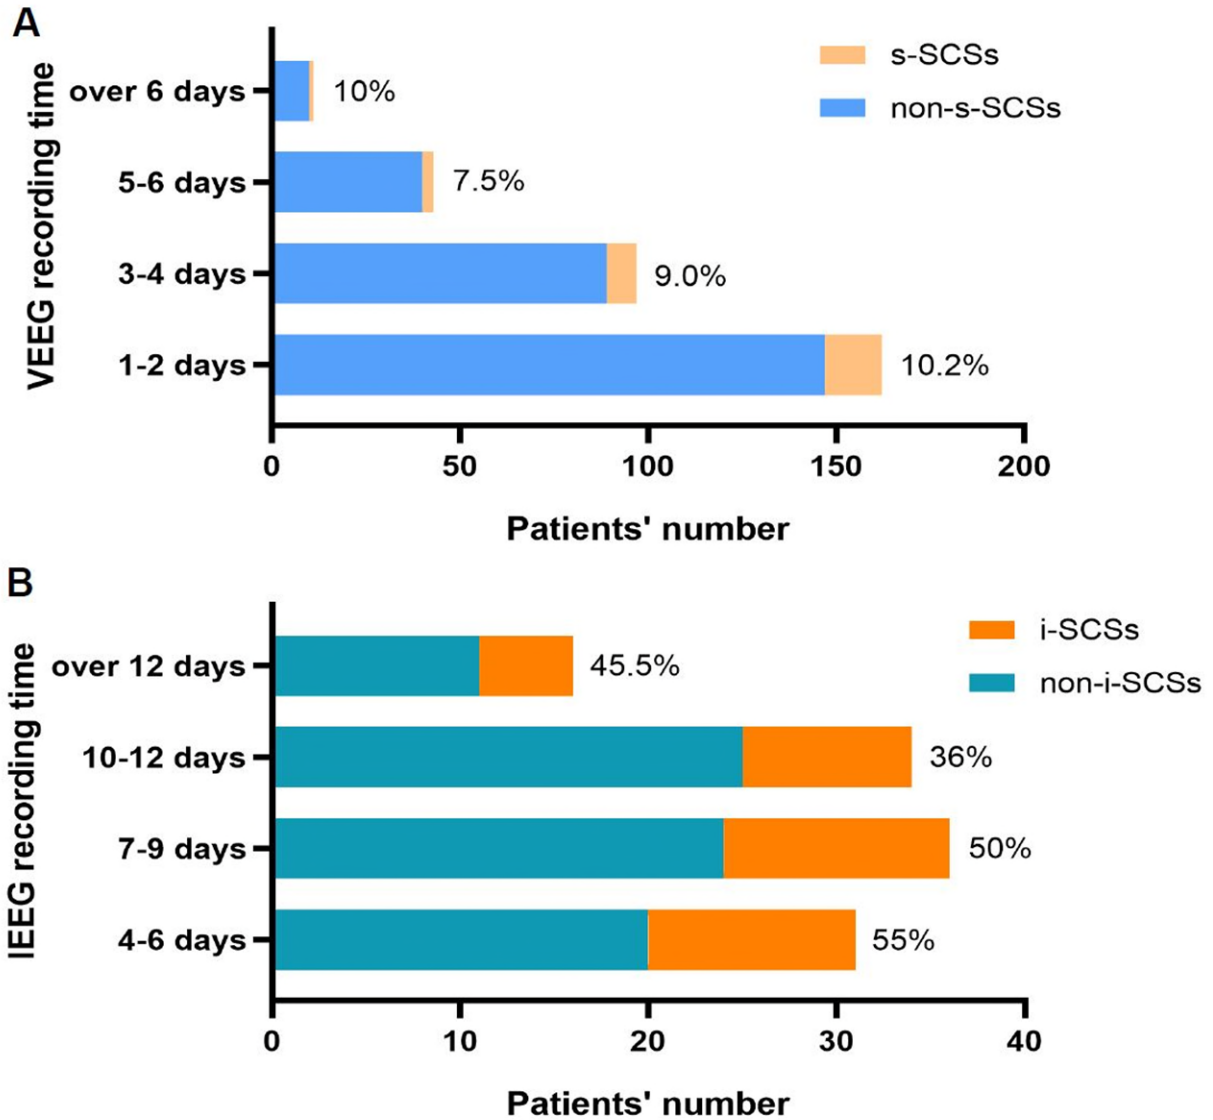

Supplementary table 1. The relation between lesion locations in MRI and SCSs in the VEEG group.

| Variables              | Whole,<br>n=286 | s-SCSs,<br>n=28 | non-s-SCSs,<br>n=258 | P-value            |
|------------------------|-----------------|-----------------|----------------------|--------------------|
| MRI-positive(location) | 243(84.97%)     | 20              | 223                  | 0.067 <sup>a</sup> |
| Frontal                | 60(20.98%)      | 7               | 53                   | 0.582 <sup>a</sup> |
| Temporal               | 152(53.15%)     | 10              | 142                  | 0.053 <sup>a</sup> |
| Parietal               | 8(2.80%)        | 2               | 6                    | 0.387 <sup>a</sup> |
| Occipital              | 4(1.40%)        | 0               | 4                    | 1.000 <sup>b</sup> |
| Insular                | 3(1.05%)        | 0               | 3                    | 1.000 <sup>b</sup> |
| Hypothalamus           | 5(1.75%)        | 0               | 5                    | 1.000 <sup>b</sup> |
| Multilobe              | 11(3.85%)       | 1               | 10                   | 1.000 <sup>b</sup> |
| MRI-negative           | 43(15.03%)      | 8               | 35                   | 0.067 <sup>a</sup> |

<sup>a</sup> Chi-square test.

<sup>b</sup> Fisher's exact test.

Abbreviations: VEEG = video-electroencephalogram; SCSs = subclinical seizures; s-SCSs = subclinical seizures recorded by scalp VEEG; non-s-SCSs = had no subclinical seizures recorded by scalp VEEG.

Supplementary table 2. The relation between lesion locations in MRI and SCSs in the IEEG group.

| Variables              | Whole,<br>n=80 | i-SCS,<br>n=40 | non-i-SCS,<br>n=40 | P-value            |
|------------------------|----------------|----------------|--------------------|--------------------|
| MRI-positive(location) | 48(60%)        | 27             | 21                 | 0.171 <sup>a</sup> |
| Frontal                | 13(16.25%)     | 5              | 8                  | 0.363 <sup>a</sup> |
| Temporal               | 24(30%)        | 17             | 7                  | 0.015 <sup>a</sup> |
| Parietal               | 3(3.75%)       | 2              | 1                  | 1.000 <sup>a</sup> |
| Occipital              | 1(1.25%)       | 0              | 1                  | 1.000 <sup>b</sup> |
| Insular                | 2(2.5%)        | 2              | 0                  | 0.494 <sup>b</sup> |
| Hypothalamus           | 2(2.5%)        | 0              | 2                  | 0.494 <sup>b</sup> |
| Multilobe              | 3(3.75%)       | 1              | 2                  | 1.000 <sup>a</sup> |
| MRI-negative           | 32(40%)        | 13             | 19                 | 0.171 <sup>a</sup> |

<sup>a</sup> Chi-square test.

<sup>b</sup> Fisher's exact test.

Abbreviations: IEEG = intracranial electroencephalogram; SCSs = subclinical seizures; i-SCSs = subclinical seizures recorded by IEEG; non-i-SCSs = had no subclinical seizures recorded by IEEG.

**Supplementary table 3. The correlation between the low metabolism region of PET and the occurrence of i-SCSs.**

| <b>Variables</b> | <b>Whole,<br/>n=80</b> | <b>i-SCS,<br/>n=40</b> | <b>non-i-SCS,<br/>n=40</b> | <b>P-value</b>     |
|------------------|------------------------|------------------------|----------------------------|--------------------|
| Frontal          | 11(13.75%)             | 8                      | 3                          | 0.105 <sup>a</sup> |
| Temporal         | 21(26.25%)             | 14                     | 7                          | 0.075 <sup>a</sup> |
| Parietal         | 4(5%)                  | 2                      | 2                          | 1.000 <sup>a</sup> |
| Occipital        | 2(2.5%)                | 0                      | 2                          | 0.494 <sup>b</sup> |
| Multilobe        | 31(38.75%)             | 12                     | 19                         | 0.108 <sup>a</sup> |
| Negative         | 10(12.5%)              | 3                      | 7                          | 0.176 <sup>a</sup> |
| Had no PET       | 1(1.25%)               | 1                      | 0                          | 1.000 <sup>b</sup> |

<sup>a</sup> Chi-square test.

<sup>b</sup> Fisher's exact test.

**Abbreviations: IEEG = intracranial electroencephalogram; SCSs = subclinical seizures; i-SCSs = subclinical seizures recorded by IEEG; non-i-SCSs = had no subclinical seizures recorded by IEEG; PET = positron emission tomography.**
